# Supplementary material for: Factors That Affect the Accumulation of Strecker Aldehydes in Standardized Wines: The Importance of pH in Oxidation
Source: MDPI journal article supplement (doi:10.3390/molecules27103056), 2022-05-10
Supplement: s1 [file s1]

Supplementary Materials:

Table S1. Correlations between all the variables and the different ways of expressing the accumulation for all the wines. Significant values with  $p(t) \leq 0.05$  highlighted in bold and checked graphically

|                                   |                  | Accumulation = final - initial (µg/L) |                 |                 |                 |                    | Accumulation/ time (µg/L / days) |                 |                 |                 |                    | Accumulation/ O <sub>2</sub> no SO <sub>2</sub> ((µg/L)/ mg/L) |                 |                 |                 |                   |
|-----------------------------------|------------------|---------------------------------------|-----------------|-----------------|-----------------|--------------------|----------------------------------|-----------------|-----------------|-----------------|--------------------|----------------------------------------------------------------|-----------------|-----------------|-----------------|-------------------|
|                                   |                  | Isobutyraldehyde                      | 2-methylbutanal | 3-methylbutanal | Methional       | Phenylacetaldehyde | Isobutyraldehyde                 | 2-methylbutanal | 3-methylbutanal | Methional       | Phenylacetaldehyde | Isobutyraldehyde                                               | 2-methylbutanal | 3-methylbutanal | methional       | Penilacetaldehído |
| Initial Fe                        | R                | <b>0.26</b>                           | <b>0.38</b>     | <b>0.20</b>     | <b>0.20</b>     | <b>0.10</b>        | 0.20                             | 0.28            | 0.12            | 0.09            | 0.04               | 0.37                                                           | 0.40            | 0.22            | 0.05            | 0.01              |
|                                   | $p(t)$           | <b>4.08E-01</b>                       | <b>2.23E-01</b> | <b>5.32E-01</b> | <b>5.39E-01</b> | <b>7.51E-01</b>    | 5.37E-01                         | 3.83E-01        | 7.08E-01        | 7.76E-01        | 9.07E-01           | 2.43E-01                                                       | 1.93E-01        | 4.88E-01        | 8.73E-01        | 9.66E-01          |
| Added Fe                          | R                | <b>-0.26</b>                          | <b>-0.38</b>    | <b>-0.20</b>    | <b>-0.20</b>    | <b>-0.10</b>       | -0.20                            | -0.28           | -0.12           | -0.09           | -0.04              | -0.37                                                          | -0.40           | -0.22           | -0.05           | -0.01             |
|                                   | $p(t)$           | <b>4.08E-01</b>                       | <b>2.23E-01</b> | <b>5.32E-01</b> | <b>5.39E-01</b> | <b>7.51E-01</b>    | 5.37E-01                         | 3.83E-01        | 7.08E-01        | 7.76E-01        | 9.07E-01           | 2.43E-01                                                       | 1.93E-01        | 4.88E-01        | 8.73E-01        | 9.66E-01          |
| PTI                               | R                | <b>0.61</b>                           | <b>0.61</b>     | <b>0.42</b>     | <b>0.69</b>     | <b>0.57</b>        | <b>0.61</b>                      | <b>0.64</b>     | 0.44            | <b>0.57</b>     | 0.52               | <b>0.70</b>                                                    | <b>0.60</b>     | 0.39            | <b>0.60</b>     | 0.46              |
|                                   | $p(t)$           | <b>3.65E-02</b>                       | <b>3.37E-02</b> | <b>1.69E-01</b> | <b>1.26E-02</b> | <b>5.51E-02</b>    | <b>3.47E-02</b>                  | <b>2.42E-02</b> | 1.57E-01        | <b>5.28E-02</b> | 8.37E-02           | <b>1.05E-02</b>                                                | <b>3.71E-02</b> | 2.11E-01        | <b>3.90E-02</b> | 1.31E-01          |
| pH                                | R                | <b>0.67</b>                           | <b>0.66</b>     | <b>0.55</b>     | <b>0.88</b>     | <b>0.80</b>        | <b>0.74</b>                      | <b>0.76</b>     | <b>0.63</b>     | <b>0.80</b>     | <b>0.77</b>        | <b>0.70</b>                                                    | <b>0.59</b>     | <b>0.46</b>     | <b>0.78</b>     | <b>0.71</b>       |
|                                   | $p(t)$           | <b>1.64E-02</b>                       | <b>2.04E-02</b> | <b>6.64E-02</b> | <b>1.70E-04</b> | <b>1.98E-03</b>    | <b>5.89E-03</b>                  | <b>3.89E-03</b> | <b>2.96E-02</b> | <b>1.79E-03</b> | <b>3.43E-03</b>    | <b>1.06E-02</b>                                                | <b>4.39E-02</b> | 1.31E-01        | <b>2.55E-03</b> | <b>9.91E-03</b>   |
| Time of oxidation                 | R                | <b>-0.81</b>                          | <b>-0.79</b>    | <b>-0.81</b>    | <b>-0.95</b>    | <b>-0.94</b>       | <b>-0.90</b>                     | <b>-0.92</b>    | <b>-0.87</b>    | <b>-0.93</b>    | <b>-0.93</b>       | <b>-0.79</b>                                                   | <b>-0.72</b>    | <b>-0.72</b>    | <b>-0.87</b>    | <b>-0.88</b>      |
|                                   | $p(t)$           | <b>1.41E-03</b>                       | <b>2.17E-03</b> | <b>1.32E-03</b> | <b>1.47E-06</b> | <b>3.91E-06</b>    | <b>5.28E-05</b>                  | <b>2.15E-05</b> | <b>2.56E-04</b> | <b>1.43E-05</b> | <b>1.47E-05</b>    | <b>2.37E-03</b>                                                | <b>8.40E-03</b> | <b>7.98E-03</b> | <b>2.31E-04</b> | <b>1.66E-04</b>   |
| Total consumed O <sub>2</sub>     | R                | <b>0.24</b>                           | <b>0.24</b>     | <b>-0.02</b>    | <b>0.23</b>     | <b>0.11</b>        | 0.18                             | 0.19            | -0.04           | 0.10            | 0.05               | 0.40                                                           | 0.24            | -0.03           | 0.08            | 0.00              |
|                                   | $p(t)$           | <b>4.45E-01</b>                       | <b>4.52E-01</b> | <b>9.41E-01</b> | <b>4.70E-01</b> | <b>7.26E-01</b>    | 5.73E-01                         | 5.46E-01        | 8.96E-01        | 7.63E-01        | 8.74E-01           | 1.96E-01                                                       | 4.53E-01        | 9.26E-01        | 7.97E-01        | 9.97E-01          |
| O <sub>2</sub> no SO <sub>2</sub> | R                | <b>0.61</b>                           | <b>0.66</b>     | <b>0.46</b>     | <b>0.66</b>     | <b>0.58</b>        | <b>0.61</b>                      | <b>0.67</b>     | 0.45            | 0.55            | 0.51               | <b>0.70</b>                                                    | <b>0.60</b>     | 0.39            | 0.44            | 0.43              |
|                                   | $p(t)$           | <b>3.41E-02</b>                       | <b>1.98E-02</b> | <b>1.36E-01</b> | <b>1.93E-02</b> | <b>4.99E-02</b>    | <b>3.54E-02</b>                  | <b>1.71E-02</b> | 1.37E-01        | 6.44E-02        | 9.00E-02           | <b>1.09E-02</b>                                                | <b>4.12E-02</b> | 2.12E-01        | 1.53E-01        | 1.62E-01          |
| Initial                           | R                | 0.22                                  | 0.24            | -0.02           | -0.22           | -0.21              | 0.09                             | 0.09            | -0.17           | -0.28           | -0.27              | 0.13                                                           | 0.21            | 0.01            | -0.23           | -0.25             |
| Free SO <sub>2</sub>              | $p(t)$           | 4.82E-01                              | 4.48E-01        | 9.60E-01        | 4.96E-01        | 5.04E-01           | 7.72E-01                         | 7.74E-01        | 5.88E-01        | 3.75E-01        | 3.97E-01           | 6.92E-01                                                       | 5.07E-01        | 9.71E-01        | 4.77E-01        | 4.38E-01          |
| Initial                           | R                | <b>-0.65</b>                          | <b>-0.69</b>    | <b>-0.72</b>    | <b>-0.78</b>    | <b>-0.77</b>       | <b>-0.73</b>                     | <b>-0.77</b>    | <b>-0.74</b>    | <b>-0.75</b>    | <b>-0.74</b>       | <b>-0.65</b>                                                   | <b>-0.61</b>    | <b>-0.61</b>    | <b>-0.65</b>    | <b>-0.70</b>      |
| Total SO <sub>2</sub>             | $p(t)$           | <b>2.08E-02</b>                       | <b>1.29E-02</b> | <b>8.88E-03</b> | <b>2.98E-03</b> | <b>3.62E-03</b>    | <b>7.61E-03</b>                  | <b>3.19E-03</b> | <b>5.54E-03</b> | <b>5.16E-03</b> | <b>6.30E-03</b>    | <b>2.33E-02</b>                                                | <b>3.38E-02</b> | <b>3.34E-02</b> | <b>2.11E-02</b> | <b>1.09E-02</b>   |
| Final total SO <sub>2</sub>       | R                | -0.50                                 | -0.46           | -0.48           | <b>-0.64</b>    | <b>-0.58</b>       | -0.54                            | -0.53           | -0.51           | <b>-0.58</b>    | -0.55              | <b>-0.58</b>                                                   | -0.44           | -0.40           | <b>-0.60</b>    | -0.56             |
|                                   | $p(t)$           | 9.93E-02                              | 1.31E-01        | 1.14E-01        | <b>2.53E-02</b> | <b>4.57E-02</b>    | 6.85E-02                         | 7.57E-02        | 8.78E-02        | <b>5.02E-02</b> | 6.30E-02           | <b>4.93E-02</b>                                                | 1.53E-01        | 1.95E-01        | <b>3.95E-02</b> | 5.87E-02          |
| Level of native aldehyde          | Isobutyraldehyde | R                                     | -0.47           | -0.44           | -0.40           | 0.02               | -0.43                            | -0.39           | -0.25           | -0.04           | -0.14              | -0.35                                                          | -0.43           | -0.45           | 0.02            | -0.19             |
|                                   |                  | $p(t)$                                | 1.20E-01        | 1.52E-01        | 1.96E-01        | 9.58E-01           | 1.64E-01                         | 2.06E-01        | 4.42E-01        | 9.05E-01        | 6.66E-01           | 2.69E-01                                                       | 1.65E-01        | 1.41E-01        | 9.60E-01        | 5.52E-01          |
|                                   | 2-methylbutanal  | R                                     | <b>-0.69</b>    | <b>-0.71</b>    | <b>-0.57</b>    | -0.17              | <b>-0.59</b>                     | <b>-0.58</b>    | -0.37           | -0.15           | -0.18              | <b>-0.63</b>                                                   | <b>-0.74</b>    | <b>-0.66</b>    | -0.14           | -0.20             |
|                                   |                  | $p(t)$                                | <b>1.22E-02</b> | <b>9.35E-03</b> | <b>5.07E-02</b> | 5.93E-01           | <b>4.37E-02</b>                  | <b>4.87E-02</b> | 2.37E-01        | 6.37E-01        | 5.80E-01           | <b>2.87E-02</b>                                                | <b>6.09E-03</b> | <b>2.03E-02</b> | 6.67E-01        | 5.28E-01          |
|                                   | 3-methylbutanal  | R                                     | <b>-0.76</b>    | <b>-0.74</b>    | <b>-0.77</b>    | -0.33              | <b>-0.70</b>                     | <b>-0.66</b>    | <b>-0.60</b>    | -0.35           | -0.37              | <b>-0.71</b>                                                   | <b>-0.77</b>    | <b>-0.83</b>    | -0.33           | -0.38             |
|                                   |                  | $p(t)$                                | <b>4.43E-03</b> | <b>6.44E-03</b> | <b>3.50E-03</b> | 2.88E-01           | <b>1.12E-02</b>                  | <b>1.87E-02</b> | <b>3.98E-02</b> | 2.65E-01        | 2.38E-01           | <b>9.78E-03</b>                                                | <b>3.16E-03</b> | <b>9.24E-04</b> | 2.98E-01        | 2.22E-01          |

|                            |                    |        |          |          |          |                  |                  |                 |                 |                 |                  |                  |          |          |          |                  |                  |
|----------------------------|--------------------|--------|----------|----------|----------|------------------|------------------|-----------------|-----------------|-----------------|------------------|------------------|----------|----------|----------|------------------|------------------|
|                            | Methional          | R      | -0.21    | -0.23    | -0.19    | -0.32            | -0.37            | -0.25           | -0.28           | -0.22           | -0.28            | -0.31            | -0.29    | -0.16    | -0.08    | -0.17            | -0.34            |
|                            |                    | $p(t)$ | 5.07E-01 | 4.71E-01 | 5.62E-01 | 3.06E-01         | 2.32E-01         | 4.36E-01        | 3.72E-01        | 5.01E-01        | 3.70E-01         | 3.26E-01         | 3.57E-01 | 6.29E-01 | 7.94E-01 | 6.01E-01         | 2.75E-01         |
|                            | Phenylacetaldehyde | R      | 0.13     | 0.09     | -0.06    | -0.02            | -0.19            | 0.02            | -0.03           | -0.13           | -0.11            | -0.19            | 0.23     | 0.16     | 0.02     | -0.03            | -0.26            |
|                            |                    | $p(t)$ | 6.94E-01 | 7.91E-01 | 8.48E-01 | 9.52E-01         | 5.53E-01         | 9.50E-01        | 9.36E-01        | 6.92E-01        | 7.30E-01         | 5.49E-01         | 4.66E-01 | 6.12E-01 | 9.47E-01 | 9.29E-01         | 4.11E-01         |
| Level of native aminoacids | Valine             | R      | -0.12    | -0.17    | -0.27    | -0.35            | -0.50            | -0.23           | -0.28           | -0.31           | -0.35            | -0.44            | -0.05    | -0.14    | -0.21    | -0.47            | <b>-0.61</b>     |
|                            |                    | $p(t)$ | 7.13E-01 | 6.07E-01 | 3.97E-01 | 2.62E-01         | 9.72E-02         | 4.76E-01        | 3.75E-01        | 3.33E-01        | 2.64E-01         | 1.52E-01         | 8.66E-01 | 6.60E-01 | 5.19E-01 | 1.25E-01         | <b>3.65E-02</b>  |
|                            | Isoleucine         | R      | -0.09    | -0.16    | -0.17    | -0.27            | -0.40            | -0.18           | -0.25           | -0.20           | -0.25            | -0.33            | 0.01     | -0.12    | -0.10    | -0.39            | -0.49            |
|                            |                    | $p(t)$ | 7.74E-01 | 6.14E-01 | 5.97E-01 | 3.88E-01         | 2.00E-01         | 5.79E-01        | 4.34E-01        | 5.39E-01        | 4.30E-01         | 2.95E-01         | 9.82E-01 | 7.16E-01 | 7.62E-01 | 2.06E-01         | 1.07E-01         |
|                            | Leucine            | R      | -0.35    | -0.34    | -0.45    | <b>-0.60</b>     | <b>-0.73</b>     | -0.49           | -0.51           | -0.52           | <b>-0.60</b>     | <b>-0.68</b>     | -0.28    | -0.26    | -0.34    | <b>-0.63</b>     | <b>-0.77</b>     |
|                            |                    | $p(t)$ | 2.59E-01 | 2.77E-01 | 1.44E-01 | <b>3.98E-02</b>  | <b>7.28E-03</b>  | 1.10E-01        | 9.25E-02        | 8.00E-02        | <b>4.04E-02</b>  | <b>1.56E-02</b>  | 3.73E-01 | 4.07E-01 | 2.81E-01 | <b>2.69E-02</b>  | <b>3.56E-03</b>  |
|                            | Methionine         | R      | -0.42    | -0.46    | -0.51    | <b>-0.78</b>     | <b>-0.82</b>     | <b>-0.56</b>    | <b>-0.61</b>    | <b>-0.61</b>    | <b>-0.75</b>     | <b>-0.78</b>     | -0.36    | -0.40    | -0.41    | <b>-0.84</b>     | <b>-0.87</b>     |
|                            |                    | $p(t)$ | 1.72E-01 | 1.35E-01 | 8.76E-02 | <b>2.83E-03</b>  | <b>1.11E-03</b>  | <b>5.98E-02</b> | <b>3.44E-02</b> | <b>3.36E-02</b> | <b>5.09E-03</b>  | <b>2.73E-03</b>  | 2.47E-01 | 2.02E-01 | 1.82E-01 | <b>5.56E-04</b>  | <b>2.42E-04</b>  |
|                            | Phenylalanine      | R      | -0.41    | -0.41    | -0.52    | <b>-0.66</b>     | <b>-0.78</b>     | -0.54           | -0.56           | <b>-0.60</b>    | <b>-0.67</b>     | <b>-0.74</b>     | -0.30    | -0.33    | -0.41    | <b>-0.73</b>     | <b>-0.86</b>     |
|                            |                    | $p(t)$ | 1.89E-01 | 1.89E-01 | 7.98E-02 | <b>2.03E-02</b>  | <b>2.64E-03</b>  | 7.00E-02        | 5.58E-02        | <b>3.93E-02</b> | <b>1.80E-02</b>  | <b>5.80E-03</b>  | 3.38E-01 | 3.02E-01 | 1.81E-01 | <b>7.05E-03</b>  | <b>3.01E-04</b>  |
| Aminoacid increase         | Valine             | R      | 0.12     | 0.17     | 0.27     | 0.35             | 0.50             | 0.23            | 0.28            | 0.31            | 0.35             | 0.44             | 0.05     | 0.14     | 0.21     | 0.47             | <b>0.61</b>      |
|                            |                    | $p(t)$ | 7.13E-01 | 6.07E-01 | 3.97E-01 | 2.62E-01         | 9.72E-02         | 4.76E-01        | 3.75E-01        | 3.33E-01        | 2.64E-01         | 1.52E-01         | 8.66E-01 | 6.60E-01 | 5.19E-01 | 1.25E-01         | <b>3.65E-02</b>  |
|                            | Isoleucine         | R      | 0.09     | 0.16     | 0.17     | 0.27             | 0.40             | 0.18            | 0.25            | 0.20            | 0.25             | 0.33             | -0.01    | 0.12     | 0.10     | 0.39             | 0.49             |
|                            |                    | $p(t)$ | 7.74E-01 | 6.14E-01 | 5.97E-01 | 3.88E-01         | 2.00E-01         | 5.79E-01        | 4.34E-01        | 5.39E-01        | 4.30E-01         | 2.95E-01         | 9.82E-01 | 7.16E-01 | 7.62E-01 | 2.06E-01         | 1.07E-01         |
|                            | Leucine            | R      | 0.35     | 0.34     | 0.45     | <b>0.60</b>      | <b>0.73</b>      | 0.49            | 0.51            | 0.52            | <b>0.60</b>      | <b>0.68</b>      | 0.28     | 0.26     | 0.34     | <b>0.63</b>      | <b>0.77</b>      |
|                            |                    | $p(t)$ | 2.59E-01 | 2.77E-01 | 1.44E-01 | <b>3.98E-02</b>  | <b>7.28E-03</b>  | 1.10E-01        | 9.25E-02        | 8.00E-02        | <b>4.04E-02</b>  | <b>1.56E-02</b>  | 3.73E-01 | 4.07E-01 | 2.81E-01 | <b>2.69E-02</b>  | <b>3.56E-03</b>  |
|                            | Methionine         | R      | 0.42     | 0.46     | 0.51     | <b>0.78</b>      | <b>0.82</b>      | 0.56            | <b>0.61</b>     | <b>0.61</b>     | <b>0.75</b>      | <b>0.78</b>      | 0.36     | 0.40     | 0.41     | <b>0.84</b>      | <b>0.87</b>      |
|                            |                    | $p(t)$ | 1.72E-01 | 1.35E-01 | 8.76E-02 | <b>2.83.10-3</b> | <b>1.11E-03</b>  | 5.98E-02        | <b>3.44E-02</b> | <b>3.36E-02</b> | <b>5.09.10-3</b> | <b>2.73E-03</b>  | 2.47E-01 | 2.02E-01 | 1.82E-01 | <b>5.56.10-4</b> | <b>2.42E-04</b>  |
|                            | Phenylalanine      | R      | 0.41     | 0.41     | 0.52     | <b>0.66</b>      | <b>0.78</b>      | <b>0.54</b>     | 0.56            | <b>0.60</b>     | <b>0.67</b>      | <b>0.74</b>      | 0.30     | 0.33     | 0.41     | <b>0.73</b>      | <b>0.86</b>      |
|                            |                    | $p(t)$ | 1.89E-01 | 1.89E-01 | 7.98E-02 | <b>2.03E-02</b>  | <b>2.64.10-3</b> | <b>7.00E-02</b> | 5.58E-02        | <b>3.93E-02</b> | <b>1.80E-02</b>  | <b>5.80.10-3</b> | 3.38E-01 | 3.02E-01 | 1.81E-01 | <b>7.05E-03</b>  | <b>3.01.10-4</b> |

**Table S2.** Correlations between all the variables and the different ways of expressing the accumulation for red wines. Significant values with  $p(t) \leq 0.05$  highlighted in bold and checked graphically

|                                      |                         | Accumulation = final - initial (µg/L) |                         |                         |               |                        | Accumulation/ time (µg/L) / days |                         |                         |               |                        | Accumulation/ O2 no SO2 ((µg/L)/ mg/L) |                         |                         |               |                        |          |
|--------------------------------------|-------------------------|---------------------------------------|-------------------------|-------------------------|---------------|------------------------|----------------------------------|-------------------------|-------------------------|---------------|------------------------|----------------------------------------|-------------------------|-------------------------|---------------|------------------------|----------|
|                                      |                         | Isobutyraldehy<br>de                  | 2-<br>methylbutan<br>al | 3-<br>methylbutan<br>al | methion<br>al | Phenylacetaldehy<br>de | Isobutyraldehy<br>de             | 2-<br>methylbutan<br>al | 3-<br>methylbutan<br>al | methion<br>al | Phenylacetaldehy<br>de | Isobutyraldehy<br>de                   | 2-<br>methylbutan<br>al | 3-<br>methylbutan<br>al | methion<br>al | Phenylacetaldehy<br>de |          |
|                                      | Initial Fe              | R                                     | 0.04                    | 0.10                    | -0.06         | -0.32                  | -0.37                            | -0.09                   | -0.07                   | -0.16         | -0.33                  | -0.38                                  | 0.05                    | 0.05                    | -0.07         | -0.49                  | -0.46    |
|                                      |                         | p(t)                                  | 9.00E-01                | 7.61E-01                | 8.56E-01      | 3.16E-01               | 2.35E-01                         | 7.79E-01                | 8.17E-01                | 6.15E-01      | 3.00E-01               | 2.23E-01                               | 8.68E-01                | 8.79E-01                | 8.20E-01      | 1.07E-01               | 1.30E-01 |
|                                      | TPI                     | R                                     | 0.68                    | 0.63                    | 0.57          | 0.55                   | 0.60                             | 0.72                    | 0.70                    | 0.52          | 0.52                   | 0.58                                   | 0.67                    | 0.67                    | 0.62          | 0.64                   | 0.65     |
|                                      |                         | p(t)                                  | 1.58E-02                | 2.87E-02                | 5.41E-02      | 6.54E-02               | 4.00E-02                         | 8.89E-03                | 1.15E-02                | 8.48E-02      | 8.13E-02               | 4.94E-02                               | 1.67E-02                | 1.65E-02                | 3.27E-02      | 2.52E-02               | 2.22E-02 |
|                                      | pH                      | R                                     | 0.61                    | 0.60                    | 0.64          | 0.88                   | 0.87                             | 0.74                    | 0.77                    | 0.71          | 0.84                   | 0.86                                   | 0.59                    | 0.56                    | 0.61          | 0.81                   | 0.85     |
|                                      |                         | p(t)                                  | 3.43E-02                | 3.82E-02                | 2.63E-02      | 1.65E-04               | 2.20E-04                         | 5.91E-03                | 3.53E-03                | 9.50E-03      | 6.73E-04               | 3.57E-04                               | 4.42E-02                | 6.04E-02                | 3.40E-02      | 1.40E-03               | 4.20E-04 |
|                                      | Time of<br>oxidation    | R                                     | -0.75                   | -0.73                   | -0.85         | -0.94                  | -0.96                            | -0.88                   | -0.90                   | -0.90         | -0.92                  | -0.94                                  | -0.69                   | -0.66                   | -0.79         | -0.86                  | -0.93    |
|                                      |                         | p(t)                                  | 5.10E-03                | 7.09E-03                | 4.73E-04      | 6.82E-06               | 1.33E-06                         | 1.35E-04                | 5.35E-05                | 7.91E-05      | 2.81E-05               | 5.77E-06                               | 1.27E-02                | 1.96E-02                | 2.15E-03      | 3.30E-04               | 1.24E-05 |
|                                      | Total<br>consumed O2    | R                                     | -0.28                   | -0.30                   | -0.51         | -0.58                  | -0.54                            | -0.40                   | -0.44                   | -0.58         | -0.58                  | -0.56                                  | -0.22                   | -0.26                   | -0.43         | -0.59                  | -0.55    |
|                                      |                         | p(t)                                  | 3.79E-01                | 3.41E-01                | 8.99E-02      | 4.82E-02               | 6.96E-02                         | 1.93E-01                | 1.52E-01                | 4.63E-02      | 4.71E-02               | 6.00E-02                               | 4.99E-01                | 4.17E-01                | 1.60E-01      | 4.44E-02               | 6.67E-02 |
|                                      | O2 no SO2               | R                                     | 0.46                    | 0.55                    | 0.37          | 0.42                   | 0.41                             | 0.47                    | 0.55                    | 0.35          | 0.36                   | 0.36                                   | 0.44                    | 0.45                    | 0.32          | 0.20                   | 0.32     |
|                                      |                         | p(t)                                  | 1.29E-01                | 6.27E-02                | 2.30E-01      | 1.74E-01               | 1.80E-01                         | 1.26E-01                | 6.27E-02                | 2.63E-01      | 2.53E-01               | 2.50E-01                               | 1.55E-01                | 1.46E-01                | 3.13E-01      | 5.41E-01               | 3.16E-01 |
|                                      | initial Free<br>SO2     | R                                     | 0.38                    | 0.41                    | 0.07          | -0.33                  | -0.24                            | 0.18                    | 0.18                    | -0.18         | -0.39                  | -0.34                                  | 0.42                    | 0.41                    | 0.12          | -0.44                  | -0.30    |
|                                      |                         | p(t)                                  | 2.17E-01                | 1.82E-01                | 8.40E-01      | 3.02E-01               | 4.55E-01                         | 5.78E-01                | 5.79E-01                | 5.71E-01      | 2.12E-01               | 2.84E-01                               | 1.74E-01                | 1.87E-01                | 7.09E-01      | 1.51E-01               | 3.45E-01 |
|                                      | initial total<br>SO2    | R                                     | -0.59                   | -0.63                   | -0.71         | -0.74                  | -0.72                            | -0.69                   | -0.74                   | -0.73         | -0.71                  | -0.70                                  | -0.53                   | -0.55                   | -0.63         | -0.63                  | -0.67    |
|                                      |                         | p(t)                                  | 4.19E-02                | 2.69E-02                | 1.01E-02      | 6.04E-03               | 8.92E-03                         | 1.37E-02                | 5.81E-03                | 6.69E-03      | 9.75E-03               | 1.16E-02                               | 7.37E-02                | 6.46E-02                | 2.87E-02      | 2.94E-02               | 1.79E-02 |
|                                      | Final total<br>SO2      | R                                     | -0.46                   | -0.33                   | -0.65         | -0.50                  | -0.50                            | -0.55                   | -0.45                   | -0.65         | -0.54                  | -0.55                                  | -0.44                   | -0.38                   | -0.66         | -0.64                  | -0.57    |
|                                      |                         | p(t)                                  | 1.30E-01                | 2.98E-01                | 2.32E-02      | 1.01E-01               | 9.53E-02                         | 6.48E-02                | 1.45E-01                | 2.19E-02      | 6.75E-02               | 6.42E-02                               | 1.54E-01                | 2.24E-01                | 1.95E-02      | 2.35E-02               | 5.32E-02 |
| Level of<br>native<br>aldehyde       | Isobutyraldehy<br>de    | R                                     | -0.85                   | -0.84                   | -0.61         | -0.36                  | -0.48                            | -0.80                   | -0.80                   | -0.45         | -0.32                  | -0.40                                  | -0.84                   | -0.81                   | -0.63         | -0.28                  | -0.45    |
|                                      |                         | p(t)                                  | 4.04E-04                | 5.70E-04                | 3.50E-02      | 2.47E-01               | 1.15E-01                         | 1.91E-03                | 1.74E-03                | 1.45E-01      | 3.14E-01               | 1.99E-01                               | 6.03E-04                | 1.25E-03                | 2.68E-02      | 3.84E-01               | 1.46E-01 |
|                                      | 2-<br>methylbutana<br>l | R                                     | -0.90                   | -0.91                   | -0.64         | -0.35                  | -0.34                            | -0.77                   | -0.77                   | -0.44         | -0.27                  | -0.28                                  | -0.93                   | -0.92                   | -0.70         | -0.26                  | -0.29    |
|                                      |                         | p(t)                                  | 7.07E-05                | 3.29E-05                | 2.43E-02      | 2.69E-01               | 2.85E-01                         | 3.16E-03                | 3.17E-03                | 1.53E-01      | 4.01E-01               | 3.85E-01                               | 1.48E-05                | 1.67E-05                | 1.09E-02      | 4.15E-01               | 3.56E-01 |
|                                      | 3-<br>methylbutana<br>l | R                                     | -0.93                   | -0.91                   | -0.83         | -0.53                  | -0.50                            | -0.87                   | -0.85                   | -0.67         | -0.48                  | -0.47                                  | -0.94                   | -0.94                   | -0.87         | -0.51                  | -0.49    |
|                                      |                         | p(t)                                  | 9.19E-06                | 3.12E-05                | 7.71E-04      | 7.92E-02               | 9.99E-02                         | 2.16E-04                | 4.78E-04                | 1.66E-02      | 1.17E-01               | 1.23E-01                               | 7.39E-06                | 6.77E-06                | 2.23E-04      | 8.86E-02               | 1.10E-01 |
| Level of<br>native<br>aminoacid<br>s | Methional               | R                                     | -0.39                   | -0.48                   | -0.38         | -0.53                  | -0.60                            | -0.49                   | -0.60                   | -0.42         | -0.50                  | -0.55                                  | -0.32                   | -0.36                   | -0.28         | -0.38                  | -0.55    |
|                                      |                         | p(t)                                  | 2.10E-01                | 1.16E-01                | 2.25E-01      | 7.39E-02               | 3.78E-02                         | 1.07E-01                | 3.96E-02                | 1.71E-01      | 9.70E-02               | 6.52E-02                               | 3.13E-01                | 2.56E-01                | 3.72E-01      | 2.24E-01               | 6.61E-02 |
|                                      | Phenylacetalde<br>hyde  | R                                     | -0.18                   | -0.26                   | -0.29         | -0.49                  | -0.55                            | -0.32                   | -0.42                   | -0.39         | -0.48                  | -0.52                                  | -0.10                   | -0.15                   | -0.18         | -0.41                  | -0.52    |
|                                      |                         | p(t)                                  | 5.75E-01                | 4.22E-01                | 3.56E-01      | 1.06E-01               | 6.59E-02                         | 3.10E-01                | 1.72E-01                | 2.16E-01      | 1.13E-01               | 8.54E-02                               | 7.65E-01                | 6.35E-01                | 5.68E-01      | 1.82E-01               | 8.03E-02 |
|                                      | Valine                  | R                                     | -0.22                   | -0.20                   | -0.37         | -0.47                  | -0.62                            | -0.36                   | -0.38                   | -0.41         | -0.46                  | -0.56                                  | -0.15                   | -0.18                   | -0.32         | -0.57                  | -0.67    |
|                                      |                         | p(t)                                  | 4.87E-01                | 5.35E-01                | 2.33E-01      | 1.22E-01               | 3.21E-02                         | 2.53E-01                | 2.22E-01                | 1.84E-01      | 1.30E-01               | 5.73E-02                               | 6.33E-01                | 5.83E-01                | 3.09E-01      | 5.50E-02               | 1.66E-02 |
|                                      | Isoleucine              | R                                     | -0.20                   | -0.20                   | -0.30         | -0.34                  | -0.53                            | -0.31                   | -0.35                   | -0.31         | -0.33                  | -0.45                                  | -0.13                   | -0.16                   | -0.24         | -0.40                  | -0.57    |
|                                      |                         | p(t)                                  | 5.25E-01                | 5.29E-01                | 3.38E-01      | 2.78E-01               | 7.40E-02                         | 3.22E-01                | 2.60E-01                | 3.30E-01      | 2.95E-01               | 1.40E-01                               | 6.96E-01                | 6.26E-01                | 4.53E-01      | 1.97E-01               | 5.20E-02 |
|                                      | Leucine                 | R                                     | -0.34                   | -0.27                   | -0.51         | -0.57                  | -0.75                            | -0.51                   | -0.49                   | -0.57         | -0.59                  | -0.70                                  | -0.26                   | -0.20                   | -0.44         | -0.58                  | -0.76    |

|                          |               |      |          |          |          |          |          |          |          |          |          |          |          |          |          |          |          |
|--------------------------|---------------|------|----------|----------|----------|----------|----------|----------|----------|----------|----------|----------|----------|----------|----------|----------|----------|
|                          |               | p(t) | 2.72E-01 | 3.97E-01 | 9.27E-02 | 5.38E-02 | 5.11E-03 | 9.37E-02 | 1.04E-01 | 5.47E-02 | 4.24E-02 | 1.07E-02 | 4.06E-01 | 5.30E-01 | 1.57E-01 | 5.00E-02 | 3.76E-03 |
|                          | Methionine    | R    | -0.46    | -0.43    | -0.64    | -0.87    | -0.92    | -0.64    | -0.66    | -0.73    | -0.84    | -0.89    | -0.40    | -0.40    | -0.58    | -0.90    | -0.95    |
|                          |               | p(t) | 1.35E-01 | 1.58E-01 | 2.54E-02 | 2.60E-04 | 2.33E-05 | 2.60E-02 | 1.86E-02 | 6.63E-03 | 5.87E-04 | 9.03E-05 | 2.01E-01 | 2.01E-01 | 4.61E-02 | 6.18E-05 | 3.00E-06 |
|                          | Phenylalanine | R    | -0.59    | -0.55    | -0.72    | -0.86    | -0.95    | -0.74    | -0.76    | -0.77    | -0.83    | -0.90    | -0.53    | -0.51    | -0.68    | -0.87    | -0.96    |
|                          |               | p(t) | 4.40E-02 | 6.30E-02 | 7.80E-03 | 3.93E-04 | 3.55E-06 | 5.70E-03 | 4.43E-03 | 3.24E-03 | 8.82E-04 | 6.53E-05 | 7.77E-02 | 9.21E-02 | 1.59E-02 | 2.57E-04 | 5.66E-07 |
| Aminoacidi<br>d'increase | Valine        | R    | 0.22     | 0.20     | 0.37     | 0.47     | 0.62     | 0.36     | 0.38     | 0.41     | 0.46     | 0.56     | 0.15     | 0.18     | 0.32     | 0.57     | 0.67     |
|                          |               | p(t) | 4.87E-01 | 5.35E-01 | 2.33E-01 | 1.22E-01 | 3.21E-02 | 2.53E-01 | 2.22E-01 | 1.84E-01 | 1.30E-01 | 5.73E-02 | 6.33E-01 | 5.83E-01 | 3.09E-01 | 5.50E-02 | 1.66E-02 |
|                          | Isoleucine    | R    | 0.20     | 0.20     | 0.30     | 0.34     | 0.53     | 0.31     | 0.35     | 0.31     | 0.33     | 0.45     | 0.13     | 0.16     | 0.24     | 0.40     | 0.57     |
|                          |               | p(t) | 5.25E-01 | 5.29E-01 | 3.38E-01 | 2.78E-01 | 7.40E-02 | 3.22E-01 | 2.60E-01 | 3.30E-01 | 2.95E-01 | 1.40E-01 | 6.96E-01 | 6.26E-01 | 4.53E-01 | 1.97E-01 | 5.20E-02 |
|                          | Leucine       | R    | 0.34     | 0.27     | 0.51     | 0.57     | 0.75     | 0.51     | 0.49     | 0.57     | 0.59     | 0.70     | 0.26     | 0.20     | 0.44     | 0.58     | 0.76     |
|                          |               | p(t) | 2.72E-01 | 3.97E-01 | 9.27E-02 | 5.38E-02 | 5.11E-03 | 9.37E-02 | 1.04E-01 | 5.47E-02 | 4.24E-02 | 1.07E-02 | 4.06E-01 | 5.30E-01 | 1.57E-01 | 5.00E-02 | 3.76E-03 |
|                          | Methionine    | R    | 0.46     | 0.43     | 0.64     | 0.87     | 0.92     | 0.64     | 0.66     | 0.73     | 0.84     | 0.89     | 0.40     | 0.40     | 0.58     | 0.90     | 0.95     |
|                          |               | p(t) | 1.35E-01 | 1.58E-01 | 2.54E-02 | 2.60E-04 | 2.33E-05 | 2.60E-02 | 1.86E-02 | 6.63E-03 | 5.87E-04 | 9.03E-05 | 2.01E-01 | 2.01E-01 | 4.61E-02 | 6.18E-05 | 3.00E-06 |
|                          | Phenylalanine | R    | 0.59     | 0.55     | 0.72     | 0.86     | 0.95     | 0.74     | 0.76     | 0.77     | 0.83     | 0.90     | 0.53     | 0.51     | 0.68     | 0.87     | 0.96     |
|                          |               | p(t) | 4.40E-02 | 6.30E-02 | 7.80E-03 | 3.93E-04 | 3.55E-06 | 5.70E-03 | 4.43E-03 | 3.24E-03 | 8.82E-04 | 6.53E-05 | 7.77E-02 | 9.21E-02 | 1.59E-02 | 2.57E-04 | 5.66E-07 |
